# Supplementary material for: Hollow porous carbon nitride immobilized on carbonized nanofibers for highly efficient visible light photocatalytic removal of NO
Source: Royal Society of Chemistry journal article supplement (doi:10.1039/c6nr02955h), 2016-01-01
Supplement: c6nr02955h1.pdf [file c6nr02955h1.pdf]

# Hollow Porous Carbon Nitride Immobilized on Carbonized Nanofibers for Highly Efficient Visible Light Photocatalytic Removal of NO

Hongxin Wu, Dongyun Chen,\* Najun Li, Qingfeng Xu, Hua Li, Jinghui He and Jianmei Lu\*

College of Chemistry, Chemical Engineering and Materials Science, Collaborative Innovation Center of Suzhou Nano Science and Technology, Soochow University, Suzhou, 215123, China

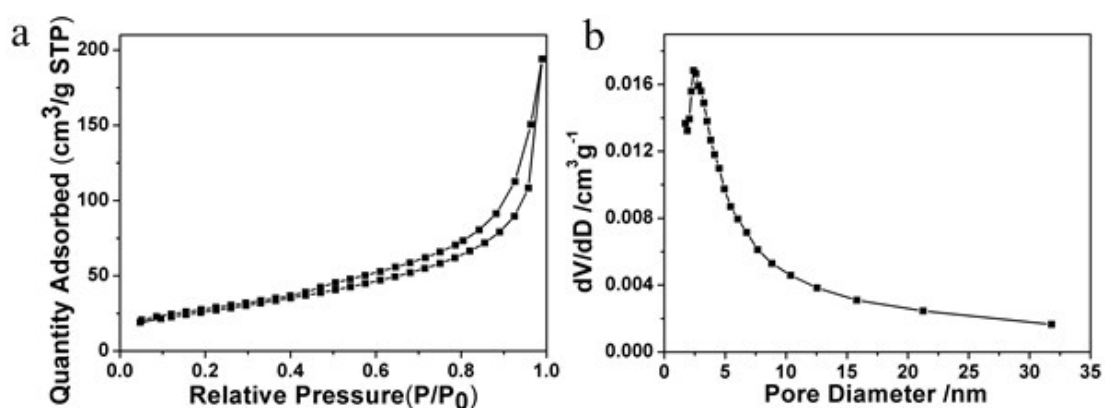

**Figure S1.** (a) N<sub>2</sub> adsorption-desorption isotherm of HCNS/rGO (b) the corresponding Barrett-Joyner-Halenda pore-size distribution of HCNS/rGO.

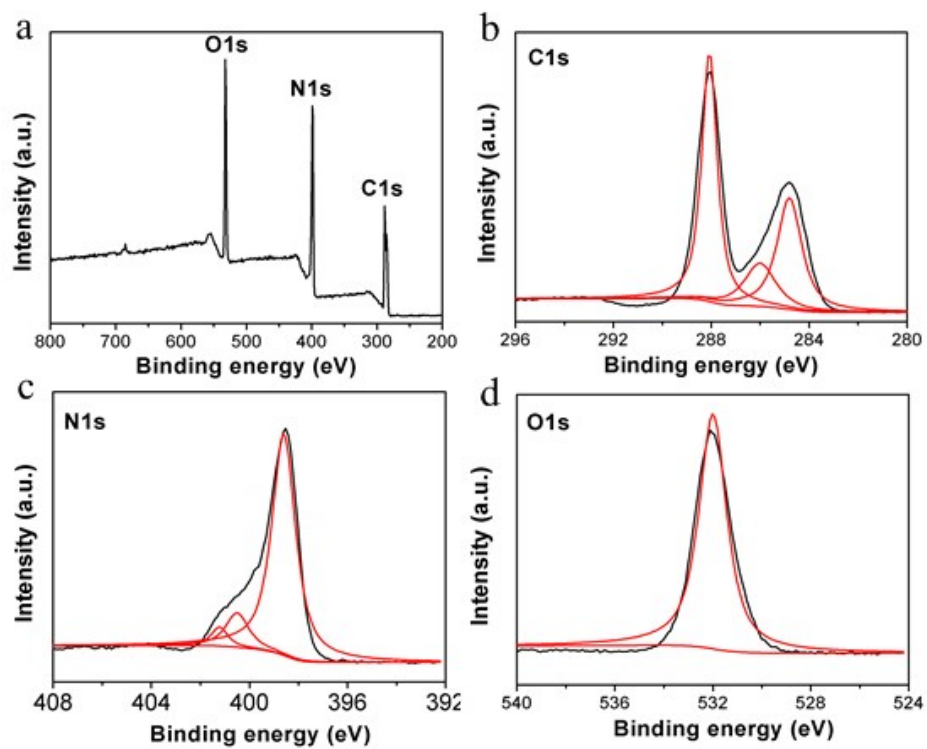

**Figure S2.** (a) XPS survey spectra of the synthesized HCNS-NH<sub>2</sub> sample, high resolution XPS spectra of (b) C1s (c) N1s (d) O1s.

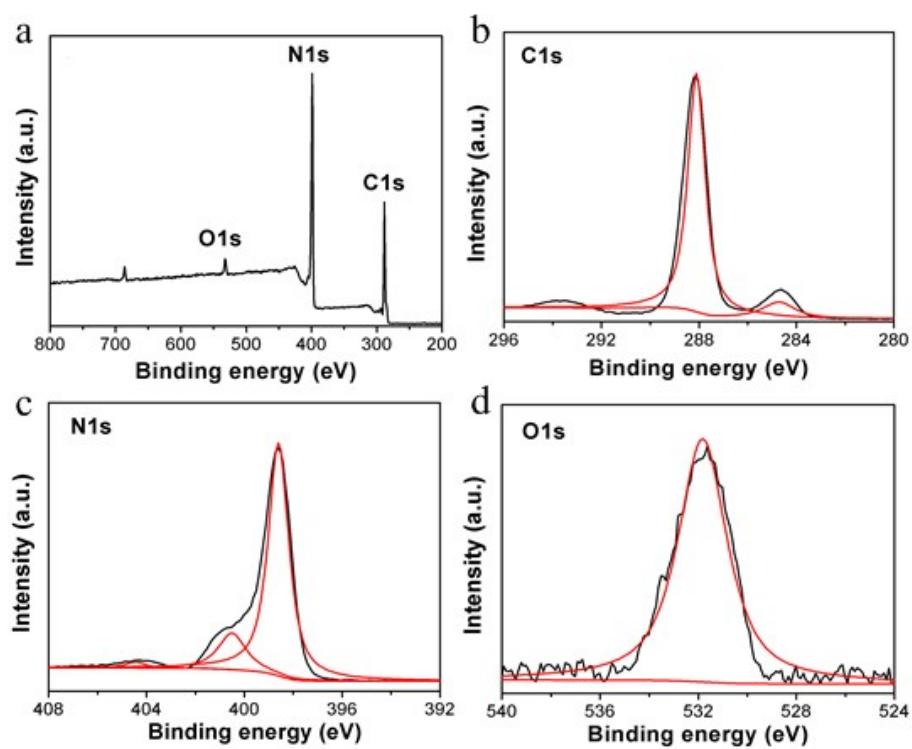

**Figure S3.** (a) XPS survey spectra of the synthesized HCNS sample, high resolution XPS spectra of (b) C1s (c) N1s (d) O1s.
